# Supplementary material for: Diagnostic accuracy of the Xpert MTB/RIF assay for extrapulmonary and pulmonary tuberculosis when testing non-respiratory samples: a systematic review
Source: PubMed Central journal article supplement (PMC4298952; doi:10.1186/s12879-014-0709-7), 2014-12-31
Supplement: 12879_2014_709_MOESM2_ESM.pdf [file 12879_2014_709_MOESM2_ESM.pdf]

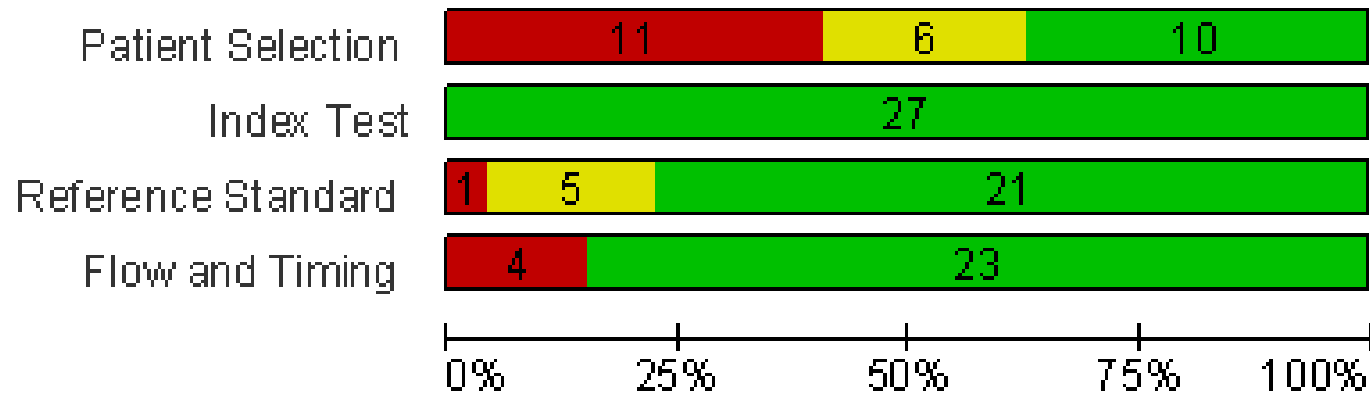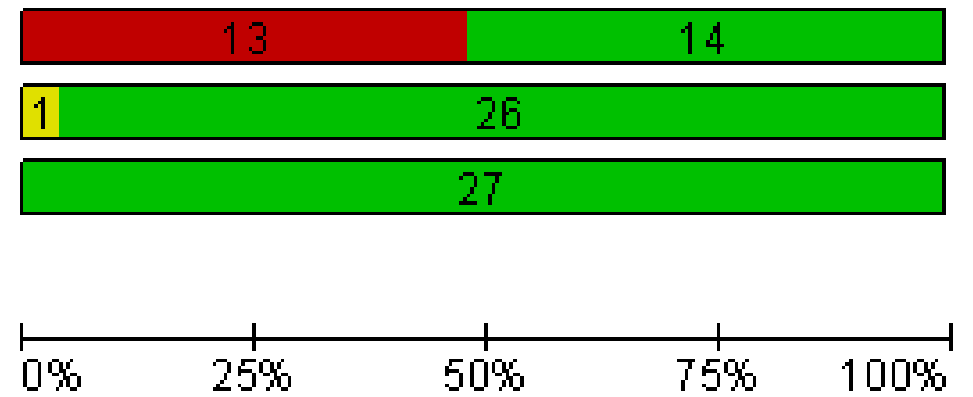

Risk of Bias

Applicability Concerns

High
  Unclear
  Low
