# Supplementary material for: Diagnostic accuracy of the Xpert MTB/RIF assay for extrapulmonary and pulmonary tuberculosis when testing non-respiratory samples: a systematic review
Source: Springer Nature journal article supplement (doi:10.1186/s12879-014-0709-7), 2014-12-01
Supplement: MOESM3 [file 12879_2014_709_MOESM3_ESM.pdf]

|                        | Risk of Bias      |            |                    |                 | Applicability Concerns |            |                    |
|------------------------|-------------------|------------|--------------------|-----------------|------------------------|------------|--------------------|
|                        | Patient Selection | Index Test | Reference Standard | Flow and Timing | Patient Selection      | Index Test | Reference Standard |
| Ablanedo-Terrazas 2013 | +                 | +          | +                  | +               | +                      | +          | +                  |
| Al-Ateah 2012          | +                 | +          | +                  | +               | -                      | +          | +                  |
| Armand 2011            | -                 | +          | +                  | +               | -                      | +          | +                  |
| Bates 2013             | +                 | +          | +                  | +               | +                      | +          | +                  |
| Causse 2011            | +                 | +          | ?                  | +               | +                      | +          | +                  |
| Deggim 2013            | +                 | +          | +                  | +               | -                      | +          | +                  |
| Feasey 2013            | -                 | +          | +                  | -               | +                      | +          | +                  |
| Friedrich 2011         | +                 | +          | ?                  | +               | +                      | +          | +                  |
| Hanif 2011             | ?                 | +          | +                  | -               | -                      | +          | +                  |
| Hillemann 2011         | +                 | +          | +                  | +               | -                      | +          | +                  |
| Ioannidis 2011         | -                 | +          | +                  | +               | -                      | ?          | +                  |
| Lawn 2012              | -                 | +          | +                  | +               | +                      | +          | +                  |
| Ligthelm 2011          | ?                 | +          | +                  | +               | +                      | +          | +                  |
| Malbruny 2011          | ?                 | +          | +                  | +               | -                      | +          | +                  |
| Miller 2011            | -                 | +          | +                  | +               | -                      | +          | +                  |
| Moure 2011             | -                 | +          | +                  | +               | -                      | +          | +                  |
| Nhu (a) 2013           | +                 | +          | +                  | +               | +                      | +          | +                  |
| Nhu (b) 2013           | +                 | +          | +                  | +               | +                      | +          | +                  |
| Nicol 2013             | -                 | +          | +                  | +               | +                      | +          | +                  |
| Peter 2012             | -                 | +          | ?                  | -               | +                      | +          | +                  |
| Porcel 2013            | -                 | +          | -                  | +               | +                      | +          | +                  |
| Teo 2011               | ?                 | +          | ?                  | +               | -                      | +          | +                  |
| Tortoli 2012           | +                 | +          | +                  | +               | -                      | +          | +                  |
| Vadwai 2011            | -                 | +          | +                  | -               | +                      | +          | +                  |
| van Rie 2013           | -                 | +          | ?                  | +               | +                      | +          | +                  |
| Zeka 2011              | ?                 | +          | +                  | +               | -                      | +          | +                  |
| Zmak 2013              | ?                 | +          | +                  | +               | -                      | +          | +                  |

- High     
 ? Unclear     
 + Low
